# Supplementary material
Source: bioRxiv or medRxiv preprint supplement (https://medrxiv.org/content/medrxiv/early/2020/10/27/2020.10.23.20154302.1/DC1/embed/media-1.pdf)
Supplement: Supplementary file [file media-1.pdf]

**SUPPLEMENTARY MATERIAL**

**eFigure 1. Course of the levels of the biological inflammatory markers LCRP (A), NLR (B) and IL-6 (C) during the visit according to hydroxyzine daily dose. Vertical lines represent standard errors.**

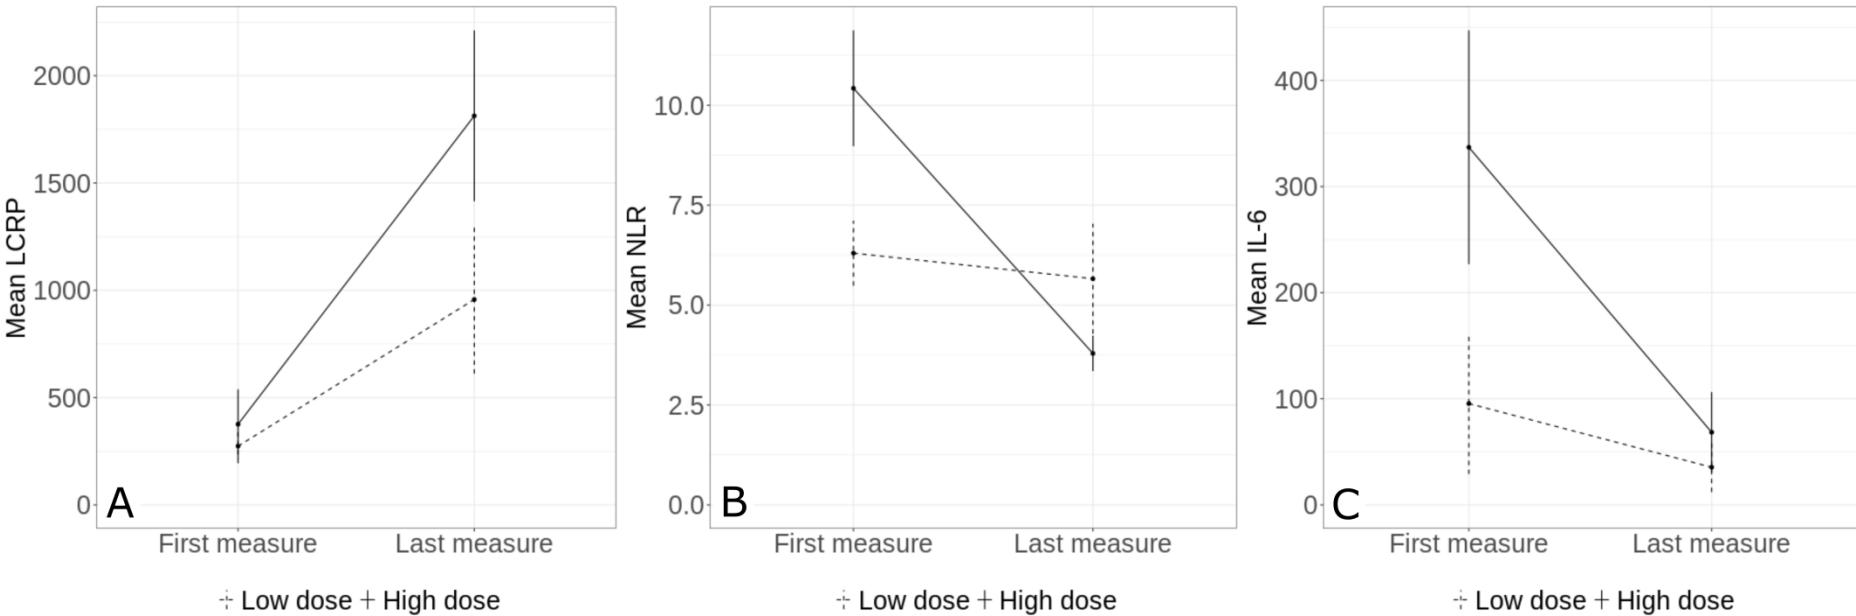

**Figure 2. Quantitative bias analysis based on the observed residual differences in age (A) and other patients characteristics (B).**

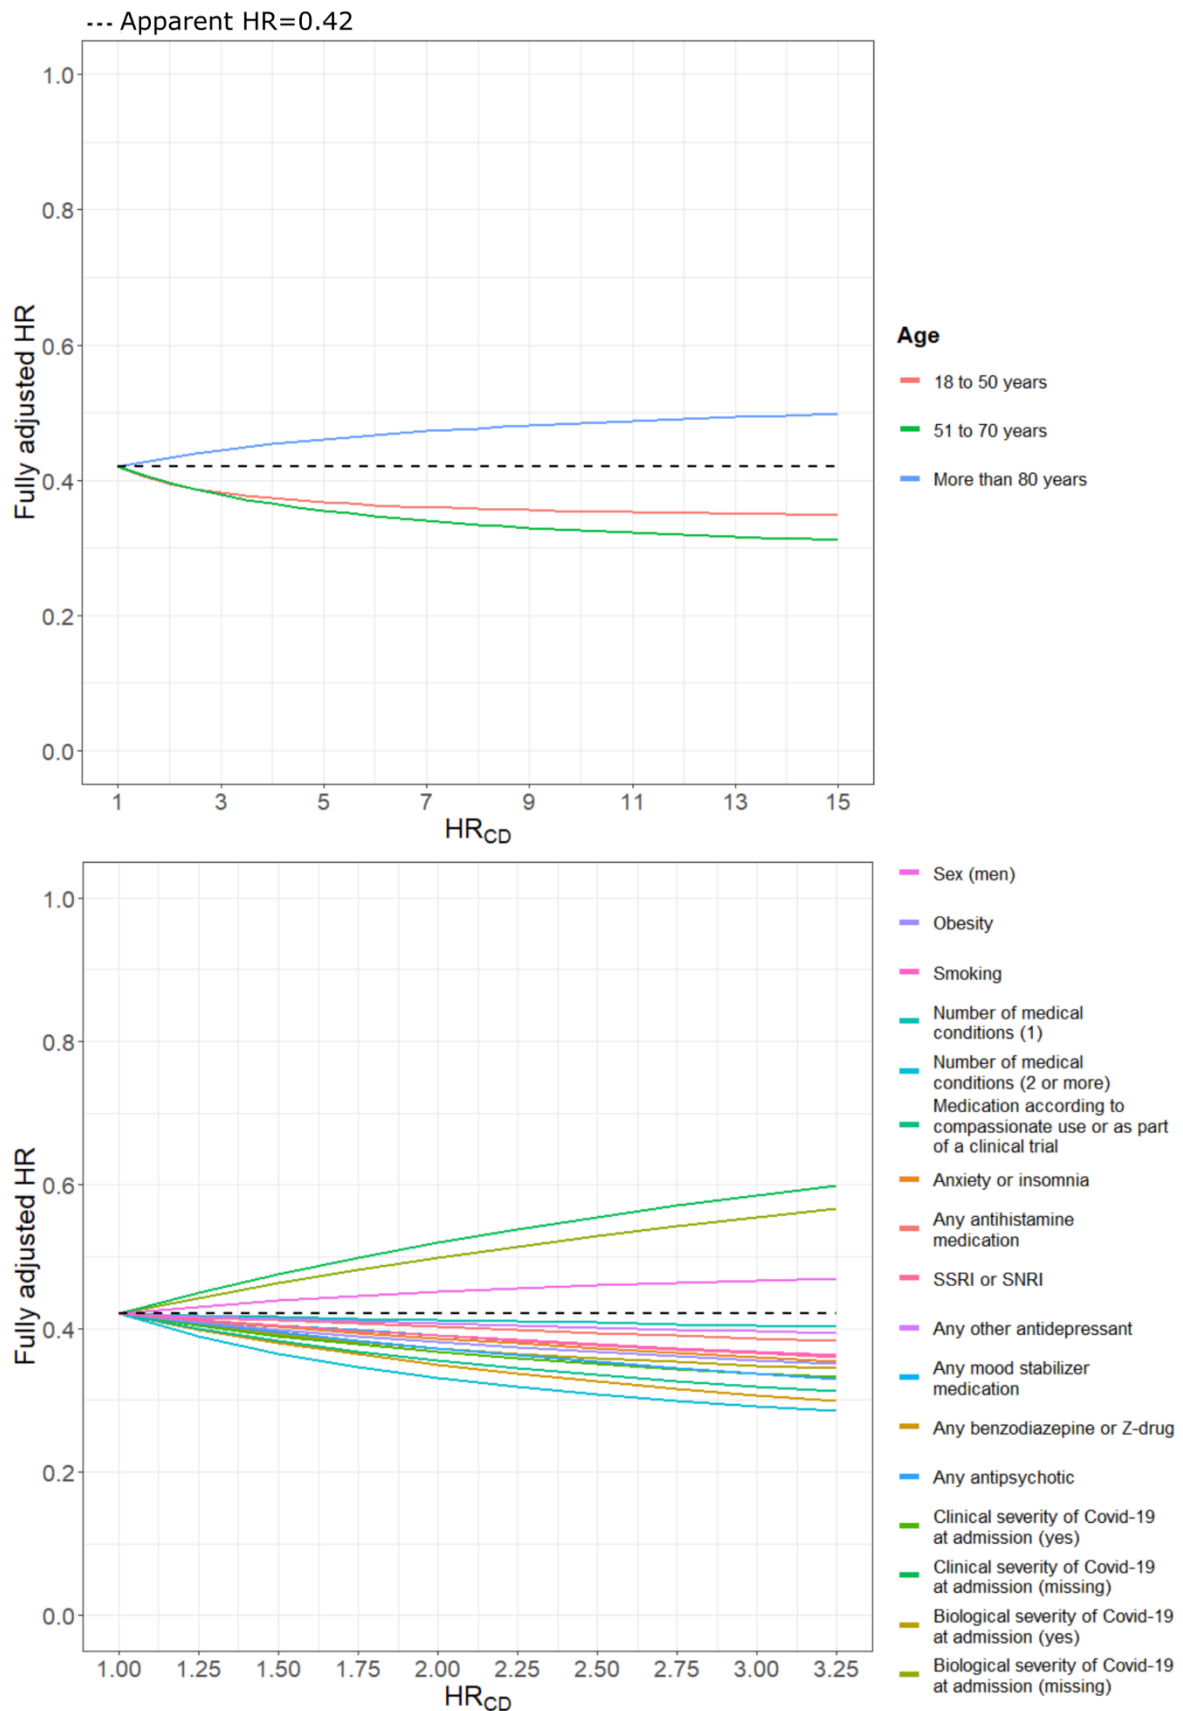

**eTable 1. Associations of baseline clinical characteristics with the endpoint of death in the cohort of patients who had been admitted to the hospital for Covid-19 (N=7,345).**

|                                              | Full population<br>(N=7,345) | With the end-<br>point event<br>(N=994) | Without the<br>end-point event<br>(N=6,351) | Endpoint of death      |                                | Collinearity diagnosis<br>(GVIF <sup>1/(2*df)</sup> ) |
|----------------------------------------------|------------------------------|-----------------------------------------|---------------------------------------------|------------------------|--------------------------------|-------------------------------------------------------|
|                                              |                              |                                         |                                             | Crude analysis         | Multivariable analysis (df=20) |                                                       |
|                                              | N (%)                        | N (%)                                   | N (%)                                       | HR (SE) / p-value      | HR (SE) / p-value              |                                                       |
| Age                                          |                              |                                         |                                             |                        |                                | 1.06                                                  |
| 18 to 50 years                               | 2709 (36.9%)                 | 42 (4.23%)                              | 2667 (42.0%)                                | Ref.                   | Ref.                           |                                                       |
| 51 to 70 years                               | 2530 (34.4%)                 | 240 (24.1%)                             | 2290 (36.1%)                                | 5.31 (0.17) / <0.001*  | 2.82 (0.20) / <0.001           |                                                       |
| 71 to 80 years                               | 942 (12.8%)                  | 273 (27.5%)                             | 669 (10.5%)                                 | 14.86 (0.17) / <0.001* | 7.53 (0.20) / <0.001           |                                                       |
| More than 80 years                           | 1164 (15.8%)                 | 439 (44.2%)                             | 725 (11.4%)                                 | 16.99 (0.16) / <0.001* | 11.35 (0.19) / <0.001          |                                                       |
| Sex                                          |                              |                                         |                                             |                        |                                | 1.06                                                  |
| Women                                        | 3619 (49.3%)                 | 359 (36.1%)                             | 3260 (51.3%)                                | Ref.                   | Ref.                           |                                                       |
| Men                                          | 3726 (50.7%)                 | 635 (63.9%)                             | 3091 (48.7%)                                | 1.68 (0.07) / <0.001*  | 1.32 (0.08) / <0.001           |                                                       |
| Obesity <sup>a</sup>                         |                              |                                         |                                             |                        |                                | 1.06                                                  |
| Yes                                          | 975 (13.3%)                  | 216 (21.7%)                             | 759 (12.0%)                                 | 1.51 (0.08) / <0.001*  | 1.23 (0.09) / 0.021            |                                                       |
| No                                           | 6370 (86.7%)                 | 778 (78.3%)                             | 5592 (88.0%)                                | Ref.                   | Ref.                           |                                                       |
| Smoking <sup>b</sup>                         |                              |                                         |                                             |                        |                                | 1.03                                                  |
| Yes                                          | 623 (8.48%)                  | 149 (15.0%)                             | 474 (7.46%)                                 | 1.51 (0.09) / <0.001*  | 0.93 (0.10) / 0.452            |                                                       |
| No                                           | 6722 (91.5%)                 | 845 (85.0%)                             | 5877 (92.5%)                                | Ref.                   | Ref.                           |                                                       |
| Number of medical<br>conditions <sup>γ</sup> |                              |                                         |                                             |                        |                                | 1.12                                                  |
| 0                                            | 4750 (64.7%)                 | 319 (32.1%)                             | 4431 (69.8%)                                | Ref.                   | Ref.                           |                                                       |
| 1                                            | 534 (7.27%)                  | 63 (6.34%)                              | 471 (7.42%)                                 | 2.29 (0.14) / <0.001*  | 1.78 (0.16) / <0.001           |                                                       |
| 2 or more                                    | 2061 (28.1%)                 | 612 (61.6%)                             | 1449 (22.8%)                                | 4.71 (0.07) / <0.001*  | 3.49 (0.09) / <0.001           |                                                       |

|                                                                                             |              |             |              |                       |                      |      |
|---------------------------------------------------------------------------------------------|--------------|-------------|--------------|-----------------------|----------------------|------|
| Medication according to<br>compassionate use or as part<br>of a clinical trial <sup>θ</sup> |              |             |              |                       |                      | 1.11 |
| <i>Yes</i>                                                                                  | 1288 (17.5%) | 226 (22.7%) | 1062 (16.7%) | 1.13 (0.08) / 0.105   | 0.74 (0.09) / 0.001  |      |
| <i>No</i>                                                                                   | 6057 (82.5%) | 768 (77.3%) | 5289 (83.3%) | Ref.                  | Ref.                 |      |
| Anxiety or insomnia <sup>ε</sup>                                                            |              |             |              |                       |                      | 1.04 |
| <i>Yes</i>                                                                                  | 299 (4.07%)  | 101 (10.2%) | 198 (3.12%)  | 2.38 (0.11) / <0.001* | 1.24 (0.12) / 0.062  |      |
| <i>No</i>                                                                                   | 7046 (95.9%) | 893 (89.8%) | 6153 (96.9%) | Ref.                  | Ref.                 |      |
| Any other antihistamine<br>medication                                                       |              |             |              |                       |                      | 1.01 |
| <i>Yes</i>                                                                                  | 100 (1.4%)   | 16 (1.6%)   | 84 (1.3%)    | 0.94 (0.25) / 0.799   | 0.67 (0.29) / 0.160  |      |
| <i>No</i>                                                                                   | 7245 (98.6%) | 978 (98.4%) | 6267 (98.7%) | Ref.                  | Ref.                 |      |
| SSRI or SNRI                                                                                |              |             |              |                       |                      | 1.08 |
| <i>Yes</i>                                                                                  | 318 (4.3%)   | 81 (8.15%)  | 237 (3.73%)  | 1.5 (0.12) / <0.001*  | 0.66 (0.12) / 0.001  |      |
| <i>No</i>                                                                                   | 7027 (95.7%) | 913 (91.9%) | 6114 (96.3%) | Ref.                  | Ref.                 |      |
| Any other antidepressant                                                                    |              |             |              |                       |                      | 1.05 |
| <i>Yes</i>                                                                                  | 142 (1.93%)  | 47 (4.73%)  | 95 (1.50%)   | 2.03 (0.15) <0.001*   | 0.85 (0.17) / 0.340  |      |
| <i>No</i>                                                                                   | 7203 (98.1%) | 947 (95.3%) | 6256 (98.5%) | Ref.                  | Ref.                 |      |
| Any mood stabilizer<br>medication <sup>Ω</sup>                                              |              |             |              |                       |                      | 1.05 |
| <i>Yes</i>                                                                                  | 287 (3.91%)  | 69 (6.94%)  | 218 (3.43%)  | 1.42 (0.12) / 0.005*  | 0.93 (0.14) / 0.587  |      |
| <i>No</i>                                                                                   | 7058 (96.1%) | 925 (93.1%) | 6133 (96.6%) | Ref.                  | Ref.                 |      |
| Any benzodiazepine or Z-<br>drug                                                            |              |             |              |                       |                      | 1.14 |
| <i>Yes</i>                                                                                  | 752 (10.2%)  | 268 (27.0%) | 484 (7.62%)  | 2.53 (0.07) / <0.001* | 1.56 (0.09) / <0.001 |      |
| <i>No</i>                                                                                   | 6593 (89.8%) | 726 (73.0%) | 5867 (92.4%) | Ref.                  | Ref.                 |      |
| Any antipsychotic                                                                           |              |             |              |                       |                      | 1.07 |

|                                                           |              |             |              |                       |                      |
|-----------------------------------------------------------|--------------|-------------|--------------|-----------------------|----------------------|
| <i>Yes</i>                                                | 264 (3.59%)  | 60 (6.04%)  | 204 (3.21%)  | 1.26 (0.13) / 0.086   | 0.80 (0.14) / 0.120  |
| <i>No</i>                                                 | 7081 (96.4%) | 934 (94.0%) | 6147 (96.8%) | Ref.                  | Ref.                 |
| Clinical severity of Covid-19 at admission <sup>u</sup>   |              |             |              |                       |                      |
| <i>Yes</i>                                                | 1564 (21.3%) | 421 (42.4%) | 1143 (18.0%) | 1.81 (0.08) / <0.001* | 1.69 (0.09) / <0.001 |
| <i>No</i>                                                 | 1858 (25.3%) | 265 (26.7%) | 1593 (25.1%) | Ref.                  | Ref.                 |
| <i>Missing</i>                                            | 3923 (53.4%) | 308 (31.0%) | 3615 (56.9%) | 0.59 (0.08) / <0.001* | 1.66 (0.11) / <0.001 |
| Biological severity of Covid-19 at admission <sup>k</sup> |              |             |              |                       |                      |
| <i>Yes</i>                                                | 2439 (33.2%) | 592 (59.6%) | 1847 (29.1%) | 1.94 (0.08) / <0.001* | 1.51 (0.09) / <0.001 |
| <i>No</i>                                                 | 1861 (25.3%) | 257 (25.9%) | 1604 (25.3%) | Ref.                  | Ref.                 |
| <i>Missing</i>                                            | 3045 (41.5%) | 145 (14.6%) | 2900 (45.7%) | 0.39 (0.1) / <0.001*  | 0.75 (0.12) / 0.022  |

<sup>a</sup> Defined as having a body-mass index higher than 30 kg/m<sup>2</sup> or an International Statistical Classification of Diseases and Related Health Problems (ICD-10) diagnosis code for obesity (E66.0, E66.1, E66.2, E66.8, E66.9).

<sup>b</sup> Smoking status was self-reported.

<sup>v</sup> Assessed using ICD-10 diagnosis codes for diabetes mellitus (E11), diseases of the circulatory system (I00-I99), diseases of the respiratory system (J00-J99), neoplasms (C00-D49), diseases of the blood and blood-forming organs and certain disorders involving the immune mechanism (D5-D8), delirium (F05, R41) and dementia (G30, G31, F01-F03).

<sup>o</sup> Any medication prescribed as part of a clinical trial or according to compassionate use (e.g., hydroxychloroquine, azithromycin, remdesivir, tocilizumab, sarilumab or dexamethasone).

<sup>e</sup> Assessed using ICD-10 diagnosis codes for anxiety, dissociative, stress-related, somatoform and other nonpsychotic mental disorders (F40-F48) and insomnia (G47).

<sup>Ω</sup> Included lithium or antiepileptic medications with mood stabilizing properties.

<sup>u</sup> Defined as having at least one of the following criteria: respiratory rate > 24 breaths/min or < 12 breaths/min, resting peripheral capillary oxygen saturation in ambient air < 90%, temperature > 40°C, or systolic blood pressure < 100 mm Hg.

<sup>k</sup> Defined as having at least one of the following criteria: high neutrophil-to-lymphocyte ratio, low lymphocyte-to-C-reactive protein (both variables were dichotomized at the median of the values observed in the full sample), and plasma lactate levels higher than 2 mmol/L.

\* p-value is significant (p<0.05).

Abbreviations: HR, hazard ratio; SE, standard error; GVIF, generalized variance inflation factor.

**eTable 2. Association between hydroxyzine use within the 3 months prior to hospital admission and not during the visit for COVID-19 and the endpoint of death in the full sample and in the matched analytic sample.**

|                                                                        | Number of events /<br>Number of patients | Crude Cox regression<br>analysis | Multivariable Cox<br>regression analysis | Analysis weighted by<br>inverse-probability-<br>weighting weights | Number of events<br>/ Number of<br>patients | Univariate Cox<br>regression in<br>matched analytic<br>samples |
|------------------------------------------------------------------------|------------------------------------------|----------------------------------|------------------------------------------|-------------------------------------------------------------------|---------------------------------------------|----------------------------------------------------------------|
|                                                                        | N (%)                                    | HR (95% CI; p-value)             | HR (95% CI; p-value)<br>(df=23)          | HR (95% CI; p-value)                                              | N (%)                                       | HR (95% CI; p-value)                                           |
| Hydroxyzine use<br>during the visit<br>for COVID-19                    | 12 / 125 (9.6%)                          | Ref.                             | Ref.                                     | Ref.                                                              | 12 / 125 (9.6%)                             | Ref.                                                           |
| Hydroxyzine<br>only within the<br>last 3 months<br>prior to the visit  | 19 / 51 (37.3%)                          | 3.25 (1.58 - 6.71;<br>0.001*)    | 3.43 (1.65 – 7.12;<br>0.001*)            | 3.28 (1.54 – 6.98;<br>0.002*)                                     | 19 / 51 (37.3%)                             | 3.02 (1.46 – 6.24;<br>0.003*)                                  |
| Hydroxyzine use<br>within the last 3<br>months and<br>during the visit | 3 / 13 (23.1%)                           | 2.07 (0.59 – 7.36;<br>0.258)     | 2.88 (0.80 – 10.30;<br>0.104)            | 2.05 (0.57 – 7.46;<br>0.274)                                      | 3 / 13 (23.1%)                              | 1.85 (0.52 – 6.59;<br>0.340)                                   |
| No hydroxyzine                                                         | 960 / 7,156 (13.4%)                      | 1.84 (1.04 – 3.25;<br>0.036*)    | 2.60 (1.47 – 4.63;<br>0.001*)            | 3.02 (1.68 – 5.42;<br><0.001*)                                    | 42 / 189 (22.2%)                            | 2.94 (1.55 – 5.59;<br>0.001*)                                  |

\* p-value is significant (p<0.05).

**eTable 3. Comparing the associations of hydroxyzine use and zopiclone use with the endpoint of death in the full sample and in the matched analytic sample.**

|                                | Number of events /<br>Number of patients | Crude Cox<br>regression analysis | Multivariable Cox<br>regression analysis | Analysis weighted<br>by inverse-<br>probability-<br>weighting weights | Number of events<br>/ Number of<br>patients | Univariate Cox<br>regression in the<br>matched analytic<br>sample (1:1) |
|--------------------------------|------------------------------------------|----------------------------------|------------------------------------------|-----------------------------------------------------------------------|---------------------------------------------|-------------------------------------------------------------------------|
|                                | N (%)                                    | HR (95% CI; p-<br>value)         | HR (95% CI; p-<br>value) (df=24)         | HR (95% CI; p-<br>value)                                              | N (%)                                       | HR (95% CI; p-<br>value)                                                |
| Zopiclone                      | 46 / 151 (30.5%)                         | Ref.                             | Ref.                                     | Ref.                                                                  | 4 / 12 (33.3%)                              | Ref.                                                                    |
| Hydroxyzine                    | 14 / 129 (10.9%)                         | 0.38 (0.21 - 0.70;<br>0.002*)    | 0.39 (0.21 – 0.73;<br>0.003*)            | 0.32 (0.15 – 0.70;<br>0.004*)                                         | 14 / 129 (10.9%)                            | 0.27 (0.09 – 0.83;<br>0.022*)                                           |
| Hydroxyzine and<br>Zopiclone   | 1 / 9 (1.1%)                             | 0.27 (0.04 - 2.00;<br>0.201)     | 0.29 (0.04 – 2.43;<br>0.255)             | 0.06 (0.01 – 0.49;<br>0.009*)                                         | 1 / 9 (1.1%)                                | 0.19 (0.02 – 1.68;<br>0.135)                                            |
| No hydroxyzine<br>or Zopiclone | 933 / 7056 (13.2%)                       | 0.61 (0.045 - 0.82;<br>0.001*)   | 0.85 (0.62 – 1.16;<br>0.305)             | 0.74 (0.51 – 1.08;<br>0.116)                                          | 49 / 264 (18.6%)                            | 0.61 (0.22 – 1.70;<br>0.349)                                            |

\* p-value is significant (p<0.05).

**eTable 4. Associations between hydroxyzine daily dose and the endpoint of death among patients using hydroxyzine during the visit (N=138).**

|                          | <b>Number of events /<br/>Number of patients</b> | <b>Crude Cox regression<br/>analysis</b> | <b>Cox regression adjusted<br/>for age and sex</b> | <b>Multivariable Cox<br/>regression analysis</b> |
|--------------------------|--------------------------------------------------|------------------------------------------|----------------------------------------------------|--------------------------------------------------|
|                          | N (%)                                            | HR (95% CI; p-value)                     | HR (95% CI; p-value)<br>(df=6)                     | HR (95% CI; p-value)<br>(df=22)                  |
| <b><i>Daily dose</i></b> |                                                  |                                          |                                                    |                                                  |
| Lower doses              | 8 / 53 (15.1%)                                   | Ref.                                     | Ref.                                               | Ref.                                             |
| Higher doses             | 2 / 53 (3.8%)                                    | 0.11 (0.02 – 0.48; 0.004*)               | 0.12 (0.03 – 0.57; 0.007*)                         | 0.10 (0.02 – 0.45; 0.003*)                       |

\* p-value is significant (p<0.05).

Because daily dose could not be ascertained with certainty in 32 (23.2%) patients, these patients have been excluded from this analysis.

The variable ‘daily dose’ has been dichotomized by the median.



**eTable 5. Association between levels of the biological inflammatory markers NLR, LCRP, IL-6 and lactates and the endpoint of death in the subsamples of patients with COVID-19 who had at least two measures of each marker during the visit.**

|                                            | First measure                            |                                               | Last measure                             |                                               |
|--------------------------------------------|------------------------------------------|-----------------------------------------------|------------------------------------------|-----------------------------------------------|
|                                            | Number of events /<br>Number of patients | Crude Cox regression<br>analysis <sup>a</sup> | Number of events /<br>Number of patients | Crude Cox regression<br>analysis <sup>a</sup> |
|                                            | Events / N (%)                           | HR (95% CI; p-value)                          | Events / N (%)                           | HR (95% CI; p-value)                          |
| <b>Biological inflammatory<br/>markers</b> |                                          |                                               |                                          |                                               |
| LCRP                                       | 426 / 1,879 (22.7%)                      | 0.83 (0.76 - 0.90; <0.001*)                   | 423 / 1,876 (22.5%)                      | 0.47 (0.43 - 0.60; <0.001*)                   |
| NLR                                        | 492 / 2,158 (22.8%)                      | 1.26 (1.11 - 1.43; <0.001*)                   | 493 / 2,159 (22.8%)                      | 2.71 (2.47 - 2.96; <0.001*)                   |
| IL-6                                       | 53 / 315 (16.8%)                         | 1.29 (1.06 - 1.57; 0.010*)                    | 53 / 3,15 (16.8%)                        | 1.53 (1.33 - 1.76; <0.001*)                   |
| Lactates                                   | 319 / 1,159 (27.5%)                      | 1.27 (0.79 – 2.03; 0.326)                     | 823 / 1,163 (27.8%)                      | 2.75 (2.43 – 3.13; <0.001*)                   |

<sup>a</sup> Values were log-transformed to address non-normal distribution of the biological variables.

**eTable 6. Course of the levels of the biological inflammatory markers NLR, LCRP, IL-6 and lactates during the visit according to hydroxyzine use.**

|                                        | <b>Full population</b>    | <b>Exposed to hydroxyzine</b> | <b>Not exposed to hydroxyzine</b> | <b>Two-way ANOVA:<br/>Interaction term</b> |
|----------------------------------------|---------------------------|-------------------------------|-----------------------------------|--------------------------------------------|
|                                        | N / Mean (SD)             | N / Mean (SD)                 | N / Mean (SD)                     | F (p) <sup>α</sup>                         |
| <b>Biological inflammatory markers</b> |                           |                               |                                   |                                            |
| LCRP                                   |                           |                               |                                   | 16.33 (<0.001*)                            |
| <i>First measurement</i>               | 1,879 / 695.1 (2,732.0)   | 63 / 308.4 (666.3)            | 1,816 / 708.5 (2,775.3)           |                                            |
| <i>Last measurement</i>                | 1,879 / 1,396.2 (3,831.7) | 63 / 1,640.5 (2,673.9)        | 1,816 / 1,387.7 (3,865.9)         |                                            |
| NLR                                    |                           |                               |                                   | 14.80 (<0.001*)                            |
| <i>First measurement</i>               | 2,161 / 7.1 (6.8)         | 72 / 8.3 (6.8)                | 2,089 / 7.1 (6.8)                 |                                            |
| <i>Last measurement</i>                | 2,161 / 6.8 (9.1)         | 72 / 4.9 (5.8)                | 2,089 / 6.8 (9.2)                 |                                            |
| IL-6                                   |                           |                               |                                   | 5.87 (0.016*)                              |
| <i>First measurement</i>               | 315 / 182.4 (405.7)       | 10/ 216.2 (230.1)             | 305 / 181.2 (410.4)               |                                            |
| <i>Last measurement</i>                | 315 / 238.1 (800.2)       | 10 / 51.9 (68.6)              | 305 / 244.2 (812.4)               |                                            |
| Lactates                               |                           |                               |                                   | 0.94 (0.333)                               |
| <i>First measurement</i>               | 1,142 / 1.5 (0.8)         | 43 / 1.4 (0.7)                | 1,099 / 1.5 (0.8)                 |                                            |
| <i>Last measurement</i>                | 1,142 / 1.5 (1.3)         | 43 / 1.2 (0.5)                | 1,099 / 1.6 (1.3)                 |                                            |

<sup>α</sup> Values were log-transformed to address non-normal distribution of the biological variables.

\* p-value is significant (p<0.05).

**eTable 7. Course of the levels of the biological inflammatory markers NLR, LCRP, and IL-6 during the visit according to hydroxyzine dose.**

|                                        | <b>Full population</b> | <b>Low dosage</b>    | <b>High dosage</b>     | <b>Two-way ANOVA:<br/>Interaction term</b> |
|----------------------------------------|------------------------|----------------------|------------------------|--------------------------------------------|
|                                        | N / Mean (SD)          | N / Mean (SD)        | N / Mean (SD)          | F (p) <sup>a</sup>                         |
| <b>Biological inflammatory markers</b> |                        |                      |                        |                                            |
| LCRP                                   |                        |                      |                        | 4.57 (0.037*)                              |
| <i>First measurement</i>               | 55 / 329.2 (708.6)     | 25 / 273.5 (399.4)   | 30 / 375.6 (893.4)     |                                            |
| <i>Last measurement</i>                | 55 / 1,423.8 (2,016.8) | 25 / 957.2 (1,728.3) | 30 / 1,812.7 (2,181.2) |                                            |
| NLR                                    |                        |                      |                        | 5.62 (0.021*)                              |
| <i>First measurement</i>               | 60 / 8.6 (7.2)         | 26 / 6.3 (4.1)       | 34 / 10.4 (8.4)        |                                            |
| <i>Last measurement</i>                | 60 / 4.6 (5.0)         | 26 / 5.7 (7.0)       | 34 / 3.8 (2.6)         |                                            |
| IL-6                                   |                        |                      |                        | 0.62 (0.454)                               |
| <i>First measurement</i>               | 10 / 216.2 (230.1)     | 5 / 95.5 (148.4)     | 337.0 (246.3)          |                                            |
| <i>Last measurement</i>                | 10 / 51.9 (68.6)       | 5 / 35.5 (52.3)      | 68.4 (84.7)            |                                            |

<sup>a</sup> Values were log-transformed to address non-normal distribution of the biological variables.

\* p-value is significant (p<0.05).
